# Supplementary material for: Asymmetric motion of magnetically actuated artificial cilia
Source: Royal Society of Chemistry journal article supplement (doi:10.1039/c7lc00556c), 2017-01-01
Supplement: c7lc00556c1.pdf [file c7lc00556c1.pdf]

*Video 1 shows the motion of a cilium in its plane of oscillation (x-y) for counter-clockwise rotation of the magnet, as viewed through the microscope. The cilium exhibits a distinct asymmetric beating with a slow forward stroke following the magnet rotation and a fast recovery stroke due to the elastic forces. The experimental parameters are  $L=480\mu\text{m}$ ,  $W=10\mu\text{m}$ ,  $\omega=0.3\text{Hz}$ ,  $B=600\text{Gauss}$ ,  $\mu=1\text{cP}$*
